# Supplementary material
Source: Research Square preprint supplement (doi:10.21203/rs.3.rs-9291028/v1)
Supplement: Supplementary file 1 [file bfeffb1720ffa70040bd9005.docx]

**Table S1. Number of imputed values by variable**

| **Variable** | **N imputed** |
| --- | --- |
| BMI | 665 |
| BRI | 665 |
| WHtR | 665 |
| DBP | 656 |
| SBP | 655 |
| Hypertension | 457 |
| Drinking | 320 |
| Sleep_time | 182 |
| Meds_dyslipidemia | 80 |
| Dyslipidemia | 79 |
| Smoking | 74 |
| HbA1c | 33 |
| LDL | 10 |
| Location | 3 |
| eGFR | 2 |

Abbreviations: Model 1 included basic demographic characteristics (age and sex). Model 2 further adjusted for socio-demographic and lifestyle-related factors, including educational attainment, residential location, marital status, smoking status, and alcohol consumption. Model 3 additionally adjusted for clinical and physiological variables, including systolic blood pressure (SBP), diastolic blood pressure(DBP), hypertension, dyslipidaemia, sleep duration, estimated glomerular filtration rate(eGFR), and lipid-lowering medication use. CTI, C-reactive protein–triglyceride–glucose index; cuCTI, cumulative CTI; CMM, cardiometabolic multimorbidity; OR, odds ratio; CI, confidence interval; IQR, interquartile range.

**Table S2. Subgroup analysis of the association between baseline CTI (per IQR) and incident cardiometabolic multimorbidity**

| **Subgroup** | **OR (95% CI)** | **P value** | **P for interaction** |
| --- | --- | --- | --- |
| Age group |  |  | 0.271 |
| <60 | 1.66 (1.38-2.01) | <0.001 |  |
| >=60 | 1.43 (1.16-1.76) | <0.001 |  |
| Sex |  |  | 0.877 |
| Female | 1.57 (1.31-1.87) | <0.001 |  |
| Male | 1.50 (1.19-1.89) | <0.001 |  |
| Smoking |  |  | 0.888 |
| No | 1.55 (1.32-1.83) | <0.001 |  |
| Yes | 1.57 (1.19-2.07) | 0.002 |  |
| Drinking |  |  | 0.405 |
| No | 1.63 (1.38-1.93) | <0.001 |  |
| Yes | 1.40 (1.08-1.80) | 0.010 |  |
| Marital status |  |  | 0.066 |
| Married | 1.61 (1.39-1.86) | <0.001 |  |
| Other | 1.23 (0.76-2.01) | 0.397 |  |
| Hypertension |  |  | 0.104 |
| No | 1.83 (1.43-2.33) | <0.001 |  |
| Yes | 1.42 (1.20-1.68) | <0.001 |  |

Abbreviations: Model 1 included basic demographic characteristics (age and sex). Model 2 further adjusted for socio-demographic and lifestyle-related factors, including educational attainment, residential location, marital status, smoking status, and alcohol consumption. Model 3 additionally adjusted for clinical and physiological variables, including systolic blood pressure (SBP), diastolic blood pressure(DBP), hypertension, dyslipidaemia, sleep duration, estimated glomerular filtration rate(eGFR), and lipid-lowering medication use. CTI, C-reactive protein–triglyceride–glucose index; cuCTI, cumulative CTI; CMM, cardiometabolic multimorbidity; OR, odds ratio; CI, confidence interval; IQR, interquartile range.

**Table S3. Subgroup analysis of the association between cumulative CTI (per IQR) and incident cardiometabolic multimorbidity**

| **Subgroup** | **OR (95% CI)** | **P value** | **P for interaction** |
| --- | --- | --- | --- |
| Age group |  |  | 0.389 |
| <60 | 1.75 (1.44-2.13) | <0.001 |  |
| >=60 | 1.55 (1.24-1.92) | <0.001 |  |
| Sex |  |  | 0.498 |
| Female | 1.73 (1.45-2.08) | <0.001 |  |
| Male | 1.52 (1.19-1.94) | <0.001 |  |
| Smoking |  |  | 0.852 |
| No | 1.69 (1.43-1.99) | <0.001 |  |
| Yes | 1.58 (1.17-2.12) | 0.003 |  |
| Drinking |  |  | 0.224 |
| No | 1.78 (1.50-2.11) | <0.001 |  |
| Yes | 1.38 (1.05-1.83) | 0.023 |  |
| Marital status |  |  | 0.148 |
| Married | 1.70 (1.46-1.98) | <0.001 |  |
| Other | 1.47 (0.89-2.43) | 0.136 |  |
| Hypertension |  |  | 0.151 |
| No | 1.96 (1.52-2.53) | <0.001 |  |
| Yes | 1.52 (1.28-1.81) | <0.001 |  |

Abbreviations: Model 1 included basic demographic characteristics (age and sex). Model 2 further adjusted for socio-demographic and lifestyle-related factors, including educational attainment, residential location, marital status, smoking status, and alcohol consumption. Model 3 additionally adjusted for clinical and physiological variables, including systolic blood pressure (SBP), diastolic blood pressure(DBP), hypertension, dyslipidaemia, sleep duration, estimated glomerular filtration rate(eGFR), and lipid-lowering medication use. CTI, C-reactive protein–triglyceride–glucose index; cuCTI, cumulative CTI; CMM, cardiometabolic multimorbidity; OR, odds ratio; CI, confidence interval; IQR, interquartile range.

**Table S4. Subgroup analysis of the association between CTI trajectory and incident cardiometabolic multimorbidity**

| **Subgroup** | **Low** | **Middle** | **High** | **P for trend** | **P for interaction** |
| --- | --- | --- | --- | --- | --- |
| Age group |  |  |  |  | 0.748 |
| <60 | Reference | 2.57 (1.61-4.08) | 3.43 (2.08-5.65) | <0.001 |  |
| >=60 | Reference | 1.98 (1.26-3.12) | 2.79 (1.69-4.59) | <0.001 |  |
| Sex |  |  |  |  | 0.348 |
| Female | Reference | 2.54 (1.64-3.92) | 3.85 (2.43-6.08) | <0.001 |  |
| Male | Reference | 2.01 (1.23-3.28) | 2.13 (1.21-3.77) | 0.007 |  |
| Smoking |  |  |  |  | 0.771 |
| No | Reference | 2.26 (1.55-3.31) | 3.33 (2.22-5.00) | <0.001 |  |
| Yes | Reference | 2.35 (1.27-4.36) | 2.59 (1.28-5.27) | 0.007 |  |
| Drinking |  |  |  |  | 0.368 |
| No | Reference | 2.38 (1.61-3.52) | 3.65 (2.40-5.54) | <0.001 |  |
| Yes | Reference | 2.06 (1.15-3.67) | 2.00 (1.03-3.91) | 0.035 |  |
| Marital status |  |  |  |  | 0.709 |
| Married | Reference | 2.30 (1.63-3.25) | 3.20 (2.21-4.64) | <0.001 |  |
| Other | Reference | 2.13 (0.84-5.40) | 3.06 (1.04-8.96) | 0.039 |  |
| Hypertension |  |  |  |  | 0.084 |
| No | Reference | 3.56 (2.08-6.11) | 4.83 (2.61-8.92) | <0.001 |  |
| Yes | Reference | 1.66 (1.11-2.48) | 2.32 (1.52-3.55) | <0.001 |  |

Abbreviations: Model 1 included basic demographic characteristics (age and sex). Model 2 further adjusted for socio-demographic and lifestyle-related factors, including educational attainment, residential location, marital status, smoking status, and alcohol consumption. Model 3 additionally adjusted for clinical and physiological variables, including systolic blood pressure (SBP), diastolic blood pressure(DBP), hypertension, dyslipidaemia, sleep duration, estimated glomerular filtration rate(eGFR), and lipid-lowering medication use. CTI, C-reactive protein–triglyceride–glucose index; cuCTI, cumulative CTI; CMM, cardiometabolic multimorbidity; OR, odds ratio; CI, confidence interval; IQR, interquartile range.

**Table S5. Sensitivity analysis : complete case analysis**

| **Exposure** | **Model 1** | | **Model 3** | |
| --- | --- | --- | --- | --- |
| Continuous (per IQR) |  |  |  |  |
| Cumulative CTI (per IQR) | 1.982 (1.733, 2.267) | <0.001 | 1.624 (1.386, 1.903) | <0.001 |
| Cumulative CTI (Q1-Q4) |  |  |  |  |
| Q1 | Ref |  | Ref |  |
| Q2 | 1.687 (1.076, 2.645) | 0.023 | 1.411 (0.868, 2.294) | 0.165 |
| Q3 | 3.319 (2.203, 4.998) | <0.001 | 2.504 (1.609, 3.899) | <0.001 |
| Q4 | 4.897 (3.296, 7.276) | <0.001 | 2.835 (1.828, 4.396) | <0.001 |
| P for trend |  | <0.001 |  | <0.001 |
| CTI trajectory (3 classes) |  |  |  |  |
| Low | Ref |  | Ref |  |
| Middle | 2.804 (2.045, 3.845) | <0.001 | 2.222 (1.569, 3.147) | <0.001 |
| High | 4.550 (3.254, 6.361) | <0.001 | 2.832 (1.934, 4.147) | <0.001 |
| P for trend |  | <0.001 |  | <0.001 |

Abbreviations: Model 1 included basic demographic characteristics (age and sex). Model 2 further adjusted for socio-demographic and lifestyle-related factors, including educational attainment, residential location, marital status, smoking status, and alcohol consumption. Model 3 additionally adjusted for clinical and physiological variables, including systolic blood pressure (SBP), diastolic blood pressure(DBP), hypertension, dyslipidaemia, sleep duration, estimated glomerular filtration rate(eGFR), and lipid-lowering medication use. CTI, C-reactive protein–triglyceride–glucose index; cuCTI, cumulative CTI; CMM, cardiometabolic multimorbidity; OR, odds ratio; CI, confidence interval; IQR, interquartile range.

**Table S6. Sensitivity analysis : excluding participants with baseline diabetes, heart disease, or stroke**

| **Exposure** | **Model 1** | | **Model 3** | |
| --- | --- | --- | --- | --- |
| Continuous (per IQR) |  |  |  |  |
| Cumulative CTI (per IQR) | 2.029 (1.615, 2.548) | <0.001 | 1.802 (1.416, 2.292) | <0.001 |
| Cumulative CTI (Q1-Q4) |  |  |  |  |
| Q1 | Ref |  | Ref |  |
| Q2 | 2.572 (1.234, 5.362) | 0.012 | 2.375 (1.136, 4.967) | 0.022 |
| Q3 | 4.740 (2.383, 9.429) | <0.001 | 3.938 (1.965, 7.891) | <0.001 |
| Q4 | 5.955 (3.027, 11.718) | <0.001 | 4.661 (2.339, 9.287) | <0.001 |
| P for trend |  | <0.001 |  | <0.001 |
| CTI trajectory (3 classes) |  |  |  |  |
| Low | Ref |  | Ref |  |
| Middle | 3.844 (2.394, 6.171) | <0.001 | 3.306 (2.045, 5.345) | <0.001 |
| High | 4.661 (2.710, 8.016) | <0.001 | 3.653 (2.093, 6.374) | <0.001 |
| P for trend |  | <0.001 |  | <0.001 |

Abbreviations: Model 1 included basic demographic characteristics (age and sex). Model 2 further adjusted for socio-demographic and lifestyle-related factors, including educational attainment, residential location, marital status, smoking status, and alcohol consumption. Model 3 additionally adjusted for clinical and physiological variables, including systolic blood pressure (SBP), diastolic blood pressure(DBP), hypertension, dyslipidaemia, sleep duration, estimated glomerular filtration rate(eGFR), and lipid-lowering medication use. CTI, C-reactive protein–triglyceride–glucose index; cuCTI, cumulative CTI; CMM, cardiometabolic multimorbidity; OR, odds ratio; CI, confidence interval; IQR, interquartile range.
